# Supplementary material for: Arsenate toxicity and metabolism in the halotolerant microalga Dunaliella salina under various phosphate regimes
Source: Royal Society of Chemistry journal article supplement (doi:10.1039/c6em00271d), 2016-01-01
Supplement: c6em00271d1.pdf [file c6em00271d1.pdf]

## **Arsenate toxicity and metabolism in the halotolerant microalga**

### ***Dunaliella salina* under various phosphate regimes**

Ya Wang<sup>1</sup>, Yanheng Zheng<sup>1</sup>, Cong Liu<sup>1</sup>, Pingping Xu<sup>1</sup>, Hao Li<sup>1</sup>, Qiaoyun Lin<sup>1</sup>, Chunhua Zhang<sup>2</sup> and Ying Ge<sup>1</sup>

<sup>1</sup> College of Resources and Environmental Sciences, Jiangsu Provincial Key Laboratory of Marine Biology, Nanjing Agricultural University, Nanjing 210095, China

<sup>2</sup> Demonstration Laboratory of Element and Life Science Research, Laboratory Centre of Life Science, College of Life Science, Nanjing Agricultural University, Nanjing, China

Corresponding author: Ying Ge

Address: College of Resources and Environmental Sciences, Jiangsu Provincial Key Laboratory of Marine Biology, Nanjing Agricultural University, Nanjing 210095, China

Telephone: 86-25-84395892

E-mail: [yingge711@njau.edu.cn](mailto:yingge711@njau.edu.cn)

\* Corresponding author. Tel.: +86 25 84395892.

E-mail addresses: [yingge711@njau.edu.cn](mailto:yingge711@njau.edu.cn) (Y. Ge).

## Supplementary Figures

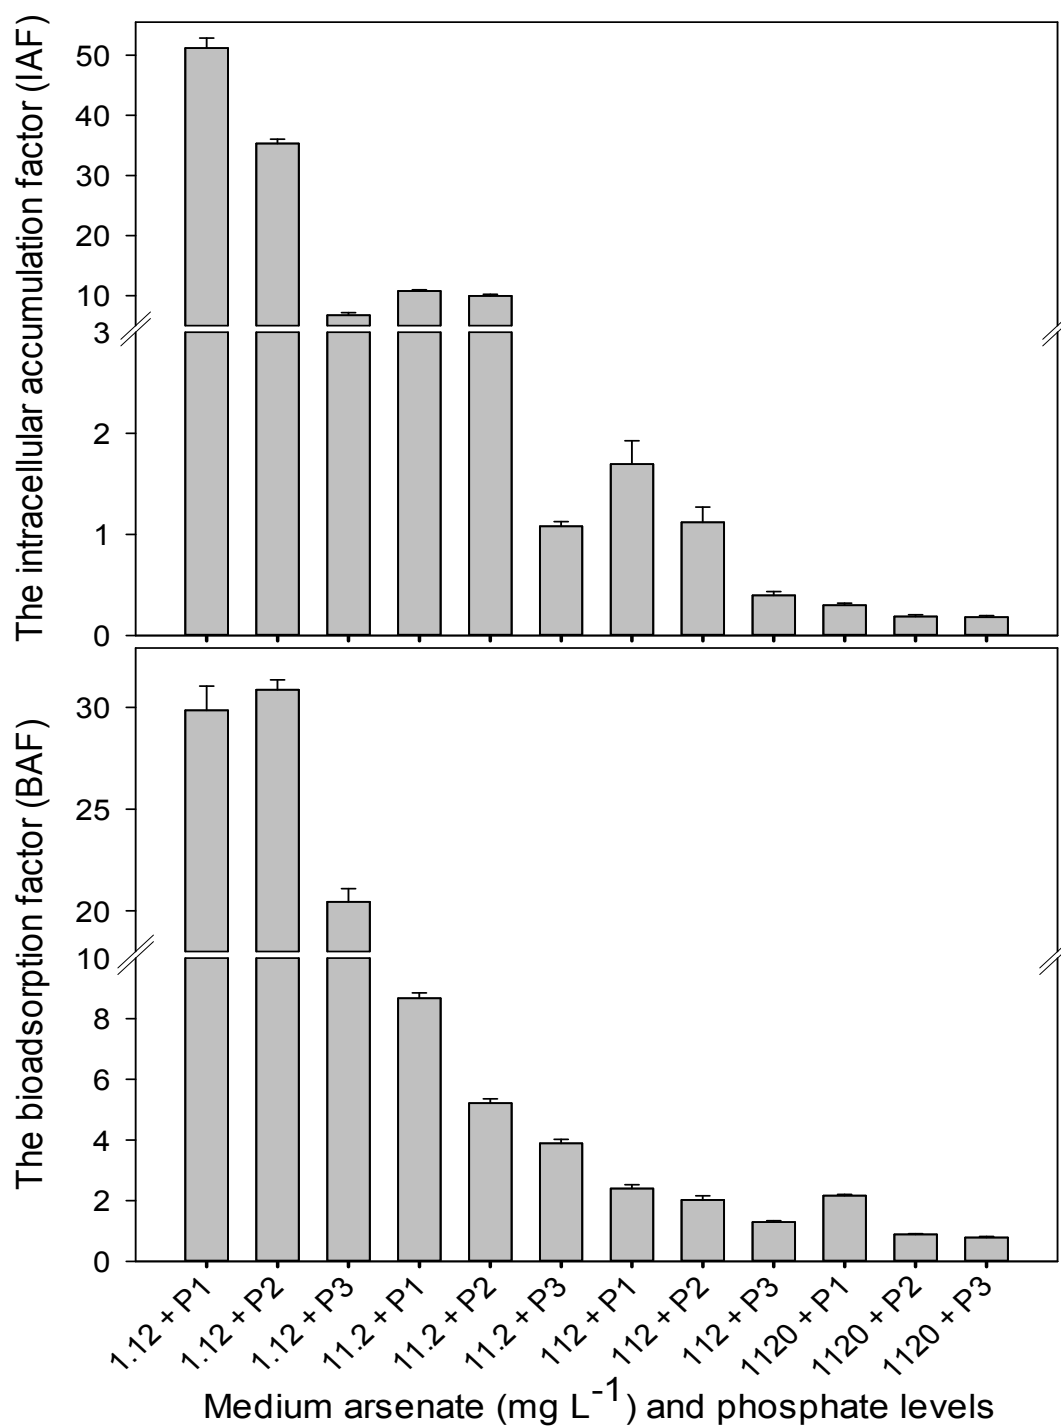

**Fig. S1** The bioadsorption factor (BAF) and intracellular accumulation factor (IAF) of *D. salina* after exposure to various indicated concentrations (1.12, 11.2, 112, 1120 mg L<sup>-1</sup>) of As(V) in P<sub>1</sub>, P<sub>2</sub> and P<sub>3</sub> growth medium for 24 h. P<sub>1</sub>, P<sub>2</sub> and P<sub>3</sub> denote 0.112, 1.12 and 11.2 mg L<sup>-1</sup> phosphate, respectively. Data are means ± SE (n=3)

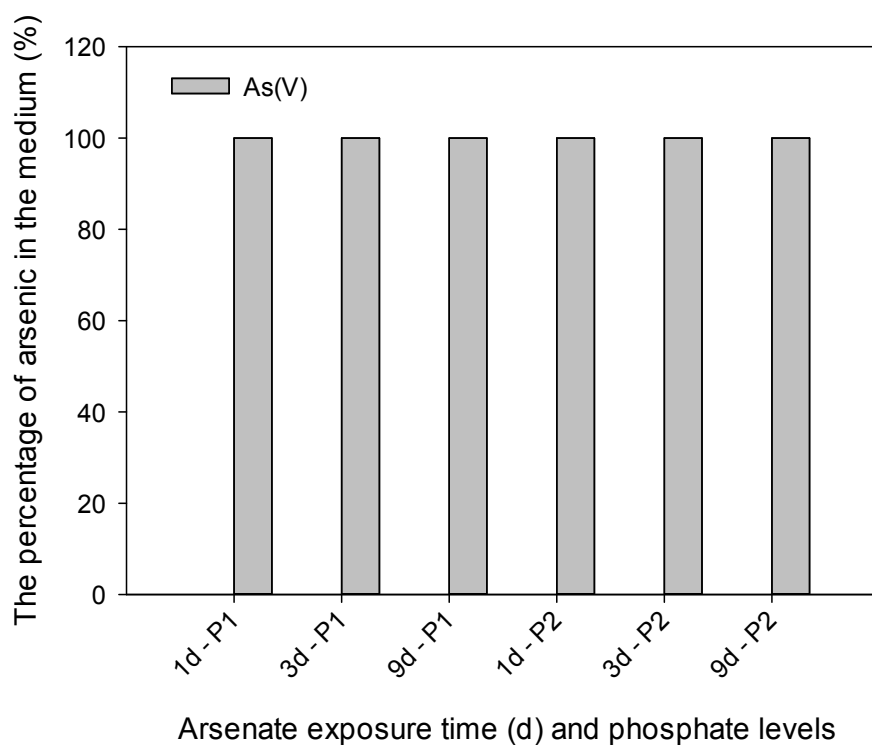

**Fig. S2** Transformation of the added As(V) ( $1.12 \text{ mg L}^{-1}$ ) in P<sub>1</sub> and P<sub>2</sub> media in which *D. salina* was grown for 3 days and removed by centrifugation and filtration. P<sub>1</sub> and P<sub>2</sub> denote  $0.112$  and  $1.12 \text{ mg L}^{-1}$  phosphate, respectively. Data are means  $\pm$  SE (n=3)

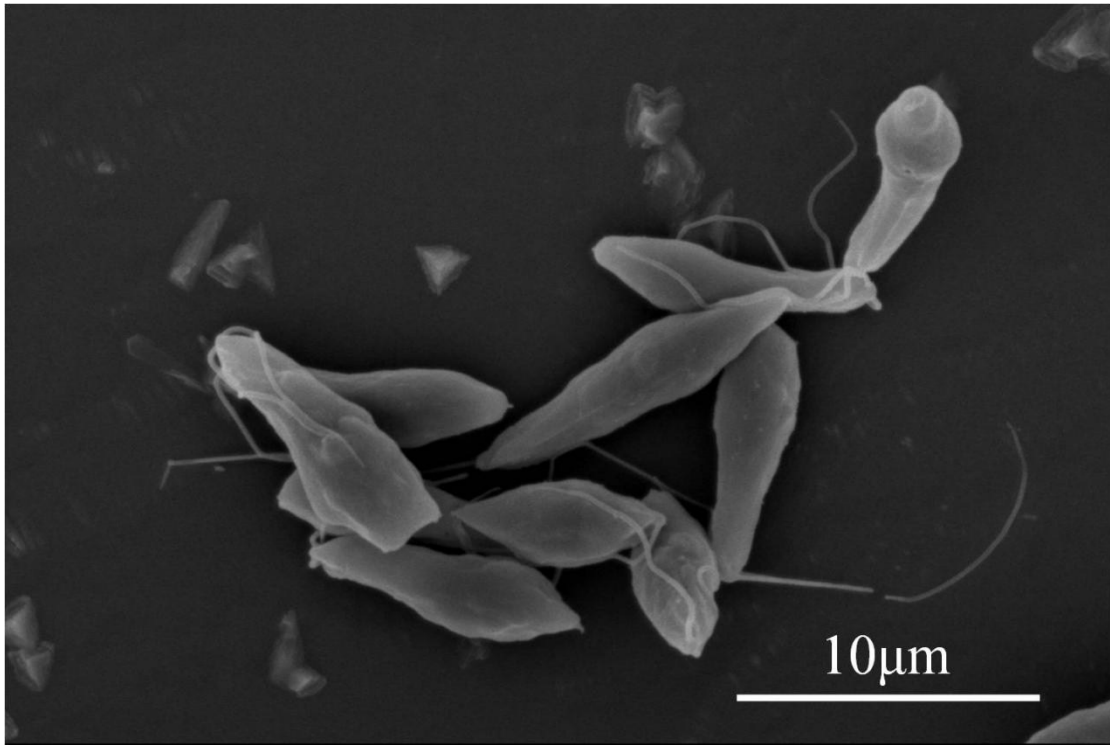

**Fig. S3** Scanning electron micrograph of axenic *Dunaliella salina*. Scale=10  $\mu\text{m}$

## Supplementary Tables

**Table S1** The component information of synthetic sea salt from Qingdao Sea-Salt Aquarium Technology Company (China).

| Item                                                | Components of sea salt<br>(S=35‰) |
|-----------------------------------------------------|-----------------------------------|
| d(t=24°C)                                           | 1.024-1.026                       |
| pH                                                  | 8.10-8.50                         |
| Na <sup>+</sup> (mg L <sup>-1</sup> )               | 9300-9700                         |
| Mg <sup>2+</sup> (mg L <sup>-1</sup> )              | 1320-1400                         |
| K <sup>+</sup> (mg L <sup>-1</sup> )                | 350-400                           |
| Ca <sup>2+</sup> (mg L <sup>-1</sup> )              | 380-430                           |
| Sr <sup>2+</sup> (mg L <sup>-1</sup> )              | 9.0-10.50                         |
| Rb <sup>2+</sup> (mg L <sup>-1</sup> )              | 0.11-0.13                         |
| Fe(mg L <sup>-1</sup> )                             | 0.06-0.20                         |
| Li <sup>+</sup> (mg L <sup>-1</sup> )               | 0.12-0.15                         |
| Cl <sup>-</sup> (mg L <sup>-1</sup> )               | 17300-17800                       |
| SO <sub>4</sub> <sup>2-</sup> (mg L <sup>-1</sup> ) | 2260-2500                         |
| Br <sup>-</sup> (mg L <sup>-1</sup> )               | 20-40                             |
| F <sup>-</sup> (mg L <sup>-1</sup> )                | 0.6-1.1                           |
| B(mg L <sup>-1</sup> )                              | 4.0-6.0                           |

**Table S2** As(V) concentration (mg L<sup>-1</sup>) and the growth inhibition (GI) rate in different treatments (A-J) of the three toxicity experiments for *D. salina* under P<sub>1</sub> (0.112 mg L<sup>-1</sup>), P<sub>2</sub> (1.12 mg L<sup>-1</sup>) and P<sub>3</sub> (11.2 mg L<sup>-1</sup>) conditions, respectively.

| As(V)<br>treatments<br>(mg L <sup>-1</sup> ) | Phosphate levels and GI (% of control) |                 |                |                 |                |                 |
|----------------------------------------------|----------------------------------------|-----------------|----------------|-----------------|----------------|-----------------|
|                                              | P <sub>1</sub>                         | GI <sub>1</sub> | P <sub>2</sub> | GI <sub>2</sub> | P <sub>3</sub> | GI <sub>3</sub> |
| A                                            | 0                                      |                 | 0              |                 | 0              |                 |
| B                                            | 0.0112                                 | 3.2 ± 0.2%      | 0.56           | 0.0 ± 0.0%      | 1.12           | 0.0 ± 0.0%      |
| C                                            | 0.056                                  | 8.1 ± 0.5%      | 1.12           | 0.0 ± 0.0%      | 11.2           | 0.0 ± 0.0%      |
| D                                            | 0.112                                  | 15.2 ± 0.9%     | 5.6            | 5.7 ± 0.3%      | 56             | 11.3 ± 0.7%     |
| E                                            | 0.56                                   | 33.4 ± 2.1%     | 11.2           | 24.3 ± 1.4%     | 112            | 32.4 ± 2.0%     |
| F                                            | 1.12                                   | 66.3 ± 4.4%     | 56             | 41.4 ± 2.4%     | 336            | 67.3 ± 4.2%     |
| G                                            | 5.6                                    | 82.1 ± 5.1%     | 112            | 84.2 ± 5.0%     | 560            | 74.2 ± 8.7%     |
| H                                            | 11.2                                   | 90.6 ± 5.7%     | 336            | 90.6 ± 6.1%     | 1120           | 89.9 ± 5.6%     |
| I                                            | 112                                    | 100 ± 0.0%      | 560            | 98.4 ± 10.2%    | 1680           | 91.6 ± 6.8%     |
| J                                            | 1120                                   | 100 ± 0.0%      | 1120           | 99.2 ± 13.4%    | 2240           | 99.0 ± 6.2%     |

Data are means ± standard deviation (n = 3).

**Table S3** Average phosphate depletion rates of the 6 media during the 9-d cultivation.

| Time (h/d) | Rate ( $\mu\text{g L}^{-1} \text{h}^{-1}$ ) |                                 |                                  |                |                                  |                                  |
|------------|---------------------------------------------|---------------------------------|----------------------------------|----------------|----------------------------------|----------------------------------|
|            | P <sub>2</sub>                              | P <sub>2</sub> +As <sub>1</sub> | P <sub>2</sub> + As <sub>2</sub> | P <sub>3</sub> | P <sub>3</sub> + As <sub>1</sub> | P <sub>3</sub> + As <sub>2</sub> |
| 0-2h       | 80.9 ± 2.0                                  | 78.3 ± 2.8                      | 70.4 ± 1.7                       | 256 ± 6.5      | 247 ± 9.6                        | 233 ± 3.6                        |
| 3-4h       | 52.7 ± 1.8                                  | 48.6 ± 1.7                      | 9.4 ± 1.5                        | 25.1 ± 1.4     | 23.8 ± 1.9                       | 29.3 ± 3.1                       |
| 5-8h       | 55.8 ± 2.3                                  | 52.7 ± 2.7                      | 38.1 ± 4.3                       | 61.6 ± 3.6     | 53.3 ± 3.0                       | 52.2 ± 2.7                       |
| 9-12h      | 33.3 ± 4.5                                  | 35.7 ± 1.5                      | 24.1 ± 3.6                       | 17.4 ± 1.5     | 23.9 ± 1.2                       | 24.6 ± 1.3                       |
| 13-24h     | 29.3 ± 2.3                                  | 28.8 ± 1.0                      | 22.1 ± 1.9                       | 5.4 ± 0.3      | 4.3 ± 0.8                        | 1.4 ± 0.2                        |
| 1-2d       | 3.9 ± 0.2                                   | 4.9 ± 0.2                       | 13 ± 0.8                         | 26.4 ± 1.2     | 25.8 ± 1.6                       | 15.3 ± 2.8                       |
| 2-3d       | n.d.                                        | n.d.                            | 3.4 ± 0.4                        | 22.5 ± 0.6     | 20.3 ± 0.9                       | 5.6 ± 1.1                        |
| 3-4d       | n.d.                                        | n.d.                            | n.d.                             | 16.7 ± 1.6     | 18.7 ± 2.0                       | 13.3 ± 2.3                       |
| 4-5d       | n.d.                                        | n.d.                            | n.d.                             | 17.1 ± 1.8     | 15.7 ± 2.3                       | 22.3 ± 2.5                       |
| 5-6d       | n.d.                                        | n.d.                            | n.d.                             | 17.4 ± 1.5     | 20.0 ± 1.8                       | 12.8 ± 2.1                       |
| 6-7d       | n.d.                                        | n.d.                            | n.d.                             | 16.3 ± 1.0     | 18.4 ± 2.4                       | 20.3 ± 2.5                       |
| 7-8d       | n.d.                                        | n.d.                            | n.d.                             | 26.3 ± 1.3     | 25.3 ± 2.3                       | 18.5 ± 2.2                       |
| 8-9d       | n.d.                                        | n.d.                            | n.d.                             | 19.2 ± 1.3     | 16.7 ± 2.7                       | 24.3 ± 2.8                       |

h and d denote hour and day, n.d. denote not detected, As<sub>1</sub> and As<sub>2</sub> denote 11.2 and 1120  $\mu\text{g L}^{-1}$  As(V), respectively. P<sub>2</sub> and P<sub>3</sub> denote 1.12 and 11.2  $\text{mg L}^{-1}$  phosphate, respectively. Data are means  $\pm$  standard deviation (n = 3).

**Table S4** Two-way ANOVA of the effects of As(V), phosphate and their interactions on the total As and P contents in *D. salina* cells for 9-d As(V) incubation (F values).

|                  | Adsorbed As | Absorbed As | P           |
|------------------|-------------|-------------|-------------|
| As(V)            | 16088.197** | 2047.160**  | 52.370**    |
| phosphate        | 56.316**    | 461.602**   | 12751.770** |
| As(V)× phosphate | 48.274**    | 441.361**   | 16.734**    |

\*\* represents significant differences between two treatments ( $p < 0.01$ ).



**Table S5** Average arsenate depletion rates of the 6 media during the 9-d cultivation.

| Time (h/d) | Rate ( $\mu\text{g L}^{-1} \text{h}^{-1}$ ) |                                 |                                 |                                 |                                 |                                 |
|------------|---------------------------------------------|---------------------------------|---------------------------------|---------------------------------|---------------------------------|---------------------------------|
|            | As <sub>1</sub> +P <sub>1</sub>             | As <sub>1</sub> +P <sub>2</sub> | As <sub>1</sub> +P <sub>3</sub> | As <sub>2</sub> +P <sub>1</sub> | As <sub>2</sub> +P <sub>2</sub> | As <sub>2</sub> +P <sub>3</sub> |
| 0-4h       | 0.11 ± 0.04                                 | 0.05 ± 0.04                     | 0.01 ± 0.03                     | 1.0 ± 0.15                      | 0.82 ± 0.23                     | 0.34 ± 0.28                     |
| 5-24h      | 0.15 ± 0.00                                 | 0.09 ± 0.01                     | 0.01 ± 0.00                     | 1.3 ± 0.26                      | 1.8 ± 0.20                      | 1.1 ± 1.3                       |
| 1-2d       | 0.20 ± 0.01                                 | 0.13 ± 0.00                     | 0.01 ± 0.00                     | 0.30 ± 0.10                     | 0.46 ± 0.27                     | 0.15 ± 0.08                     |
| 2-3d       | 0.10 ± 0.00                                 | 0.12 ± 0.00                     | 0.00 ± 0.00                     | 0.77 ± 0.26                     | 0.47 ± 0.13                     | 1.1 ± 0.06                      |
| 3-4d       | 0.01 ± 0.00                                 | 0.07 ± 0.00                     | 0.00 ± 0.00                     | 1.6 ± 0.21                      | 0.68 ± 0.38                     | -1.15 ± 0.66                    |
| 4-5d       | 0.00 ± 0.00                                 | 0.06 ± 0.00                     | 0.00 ± 0.00                     | 1.0 ± 1.0                       | -0.15 ± 0.47                    | 0.81 ± 0.73                     |
| 5-6d       | 0.00 ± 0.00                                 | 0.01 ± 0.00                     | 0.00 ± 0.00                     | -0.19 ± 0.15                    | -0.05 ± 0.07                    | -0.03 ± 0.08                    |
| 6-7d       | 0.00 ± 0.00                                 | 0.00 ± 0.00                     | 0.01 ± 0.00                     | -0.44 ± 0.35                    | -0.36 ± 0.10                    | -0.47 ± 0.41                    |
| 7-8d       | 0.00 ± 0.00                                 | 0.00 ± 0.00                     | 0.01 ± 0.00                     | -1.0 ± 1.0                      | 0.87 ± 0.48                     | -0.38 ± 0.44                    |
| 8-9d       | 0.00 ± 0.00                                 | 0.00 ± 0.00                     | 0.02 ± 0.00                     | 0.70 ± 0.14                     | 1.9 ± 0.43                      | -0.18 ± 0.26                    |

h and d denote hour and day. n.d. denote not detected. As<sub>1</sub> and As<sub>2</sub> denote 11.2 and 1120  $\mu\text{g L}^{-1}$  As(V), respectively. P<sub>1</sub>, P<sub>2</sub> and P<sub>3</sub> denote 0.112, 1.12 and 11.2  $\text{mg L}^{-1}$  phosphate, respectively. Data are means  $\pm$  standard deviation (n = 3).
